# Supplementary material for: On the evolutionary origins of equity
Source: PubMed Central journal article supplement (PMC5360236; doi:10.1371/journal.pone.0173636), 2017-03-21
Supplement: pone.0173636.s001.pdf [file pone.0173636.s001.pdf]

1 Supplementary information for manuscript

2 On the evolutionary origins of equity

# 3 1 Simulation procedures

## 4 1.1 Simulations Set 3: contribution through time invested

### 5 1.1.1 Methods

6 Having a higher productivity is only one way to contribute more to a cooperative interaction.  
7 Another natural way is to spend more time to amass resources. To test the robustness of our  
8 partner choice mechanism, we thus created a third set of simulations in which there are no more  
9 differences of productivity between individuals, but one of the two individuals in a cooperating  
10 dyad has to invest  $m$  times more time than her partner. We thus model the possibility that  
11 there is a cooperative role more time-consuming than the other. In practice, we model this  
12 by randomly attributing a “high investment of time” role to the partner or the decision maker  
13 when an encounter takes place. The decision maker then decides whether or not she wants to  
14 cooperate with her partner based on her partner’s reputation for a given level of investment  
15 into cooperation. Each individual is thus characterized by 4 genetic variables, two  $r_{kl}$  and two  
16  $MAR_{kl}$ , with  $k$  and  $l \in \{H, L\}$ , denoting an individual’s time investment (H = High, L =  
17 Low). If the partner is accepted, individuals share a constant resource of size 1 at each unit  
18 of time, and the end of the interaction is determined in the same way than in Simulations Set  
19 1, through a constant split rate  $\tau$ . When a split happens though, the individual who needs  
20 to invest more time is prevented to encounter new individuals for a length of time equal to  
21  $(m - 1) * (\text{the length of the interaction})$ . Because this individual is prevented to encounter  
22 other individuals during this period, one can interpret this period as a period in which this  
23 individual is still investing time into the previous interaction.

24 All other methodological details for Simulations Set 3 are the same as in Simulations Set  
25 1. In particular, we start from a population of individuals giving zero reward even when they

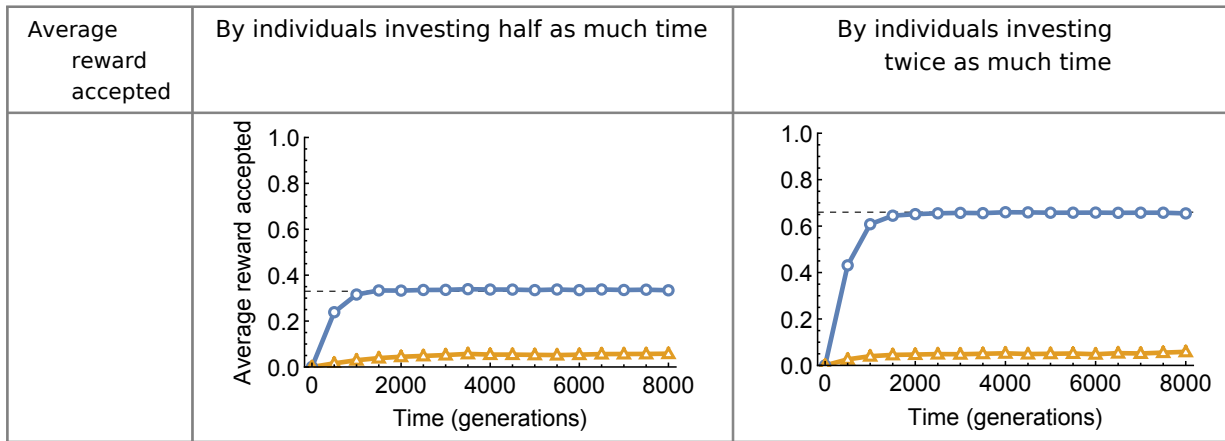

Figure SM1: Evolution of the average reward accepted, depending on whether partners invest twice as much or half as much time into cooperation. Individuals investing twice as much time receive twice as much resources at equilibrium, and vice-versa.

invest less time into cooperation, and observe what will be the relationship between contribution (time invested) and rewards at the evolutionary equilibrium.

### 1.1.2 Results

Simulations Set 3 show that proportional rewards also evolve when individuals differ not by their productivity but by the time they invest in cooperation (Fig SM1). Setting  $m = 2$ , one individual of the pair has to invest twice as much time as the other. When the decision maker invests twice as much time, the partner agrees to reward him with 66% of the total resource at the evolutionary equilibrium, when partner choice is not costly. Conversely, when decision makers invest half as much time as their partner, they accept rewards of 33% only, showing that the fitness-maximizing strategy in this situation is to accept rewards proportional to each partner's relative time investment.

## 37 **2 Analytical model.**

38 We developed an analytical model to model the situation where individuals differ by their pro-  
39 ductivity (but not effort), and where only two productivities coexist in the population. The  
40 analytical model incorporates all of the features of the simulations, but with one simplification:  
41 we assume that the total number of interactions accepted per unit of time is the same for each  
42 individual. With this assumption, rejecting an opportunity to cooperate does not compromise  
43 the chances of cooperating later, but on the contrary grants new opportunities. This situa-  
44 tion is analogous to the condition where  $\frac{\beta}{\tau}$  tends towards infinity in the simulations: social  
45 opportunities are plentiful at the scale of the length of interactions. When individuals reject an  
46 interaction, however, they are forced to postpone their social interaction to a later encounter.  
47 We assume that this entails an explicit cost expressed as a discounting factor  $\delta$  ( $0 \leq \delta < 1$ ). If  
48 we call the average payoff of an individual of productivity  $i$   $G_i$ , then  $\delta G_i$  will be the average  
49 expected payoff in the next interaction after rejecting an offer. When  $\delta$  equals 1, refusing an  
50 interaction carries no cost; when  $\delta$  equals 0, refusing an interaction will result in zero payoff  
51 from the next interaction. In practice, we will neglect the case where  $\delta$  equals 1, as it leads to  
52 artefactual results (see below).

53 The assumption that only partners can decide of the division in our model is necessary so  
54 that the evolution of fairness is not explained trivially. When only one individual can decide,  
55 natural selection favors selfishness [1]. This is easy to understand. On the one hand, whatever  
56 reward a partner suggests, accepting it brings a greater gain than rejecting it for the decision  
57 maker. Therefore, in all cases, natural selection favors indiscriminate partners, with decision  
58 makers taking whatever benefits are made available to them. On the other hand, and as a  
59 result, selection favors stingy partners, offering the minimal possible amount. Because decision  
60 makers are in such an inferior bargaining position, in the following analysis we will focus on

61 decision makers'—and not partners'—payoffs. A decision maker receiving a large share of the  
62 resource is a strong indication that there are evolutionary forces at work against the expected  
63 partners' selfishness.

64 All our analyses assume that (i) individuals enter the population at a constant rate, (ii)  
65 evolution is slow compared to an individual's lifespan (and thus ) (iii) mutations are rare, and  
66 that (iv) there is no recombination between genetic traits ( $p_{ij}$  and  $q_{ij}$ ). As a consequence of  
67 (i) and (ii), the composition of the population does not change during an individual's life. As  
68 a consequence of (iii) and (iv), at any evolutionary equilibrium, all the strategies present in  
69 the population must reach the same payoff for individuals of a given strength (only a high  
70 mutation rate or recombination rate could continuously re-introduce maladaptive strategies in  
71 the population, yielding a variance of payoffs at each generation).

72 Here we ask the same question answered in the main paper through simulations: how will  
73 the behavioural traits  $r_{ij}$  and  $\text{MAR}_{ij}$  ( $i$  and  $j \in \{HP, LP\}$ ) evolve in an environment where  
74 LP and HP individuals coexist and share resources? As a reminder,  $\text{MAR}_{LPHP}$  reads as "the  
75 minimum reward that a LP individual will accept from a HP individual," and  $r_{HP LP}$  as "the  
76 reward a HP individual will give to a LP individual."

77 Following the precise evolutionary dynamics of the system to answer this question is quite a  
78 complex challenge, in particular due to epistasis phenomena. The low fitness benefits brought  
79 by a reward  $r$  can be compensated by high benefits from an acceptance threshold MAR, or small  
80 benefits obtained in interactions with individuals of one productivity could be compensated by  
81 high benefits received in interactions with the other productivity, generating linkage disequilib-  
82 rium [2]. But as in [1], it is easier to derive simple conditions on the payoff an individual would  
83 or would not have an interest in accepting at the evolutionary equilibrium.

## 84 2.1 Solving the system

85 The reasoning is more normative than descriptive, as we consider a situation in which the equi-  
 86 librium has already been reached, and derive constraints on the values of traits that individuals  
 87 should display at the equilibrium. To derive the payoff a LP individual should receive from a  
 88 HP individual at the evolutionary equilibrium, we need to consider four arguments:

89 1. **All individuals with the same productivity must gain the same payoff.** At  
 90 the equilibrium, all HP individuals should gain the same payoff  $G_{HP}$  per interaction  
 91 (otherwise it wouldn't be an equilibrium), and the same is true for LP individuals. We  
 92 thus only have two average payoffs in the population at the equilibrium. The average  
 93 payoff of a HP individual is labeled  $G_{HP}$ , and that of a LP individual is written  $G_{LP}$ .

94 2. **Every individual of productivity  $i$  accepts exactly  $\delta G_i$ ,** with  $i \in \{HP, LP\}$ . If an  
 95 individual's average payoff is  $G_i$ , his expected payoff in the next interaction (if the current  
 96 interaction is refused) will be  $\delta G_i$ . As a consequence, a decision maker should never refuse  
 97 a reward that is above the corresponding  $\delta G_i$ , but should always refuse rewards that  
 98 are below this level. At the equilibrium, because rewards from partners should evolve  
 99 toward the minimum that decision makers will accept, individuals will always demand  
 100 and accept exactly  $\delta G_i$ , no matter who they are interacting with (regardless of their  
 101 partner's productivity). We thus have:

$$\left\{ \begin{array}{l} \text{MAR}_{HPHP} = \delta G_{HP} \\ \text{MAR}_{HPLP} = \delta G_{HP} \\ \text{MAR}_{LPPL} = \delta G_{LP} \\ \text{MAR}_{LPHP} = \delta G_{LP} \end{array} \right. \quad (1)$$

102 3. **Partners give their decision makers what they want at the evolutionary equi-**  
 103 **librium, as long as  $\frac{a}{b} > \frac{\delta(x-1)}{\delta x-2}$ .**

104 Knowing (1) and (2), it can be shown that partners are always better off giving their  
 105 decision makers what they "ask for" ( $\delta G_i$ ) at the evolutionary equilibrium, as long as  
 106  $\delta < 1$ . The reasoning is as follows.

107 Suppose that at the evolutionary equilibrium, all LP individuals refuse to give HP in-  
 108 dividuals what they ask for, namely  $\delta G_{HP}$  (but all other demands are satisfied). The  
 109 average social payoff of a LP individual in this population is then

$$G_{LP} = (1 - x) \left( \frac{\delta G_{LP}}{2} + \frac{\delta G_{LP}}{2} \right) + \frac{1}{2} x (a + a) \quad (2)$$

110 with  $x$  the proportion of LP individuals in the population and  $a$  the productivity of  
 111 LP individuals.  $G_{LP}$  can be decomposed into three terms: an average payoff obtained in  
 112 interactions with other LP individuals  $\frac{1}{2} (a + a)$ , an average payoff obtained in interactions  
 113 with HP individuals when HP individuals play the role of decision makers (in this case,  
 114 under our hypothesis the reward will be rejected and the LP individual's payoff will  
 115 be discounted by  $\delta$ ), and, finally, an average payoff obtained in interactions with HP  
 116 individuals when HP individuals are partners (the LP individual's MAR is met, so they  
 117 gain  $\delta G_{LP}$ ).

118 Similarly, the payoff of a HP individual in this population is

$$G_{HP} = x \left( \frac{\delta G_{HP}}{2} + \frac{1}{2} (-\delta G_{LP} + b + a) \right) + \frac{1}{2} (1 - x) (b + b) \quad (3)$$

119 with  $b$  the productivity of HP individuals. Solving the system composed of equations (2)  
 120 and (3) gives us an expression for  $G_{HP}$  and  $G_{LP}$ . The question we need to answer now  
 121 is the following: what would happen if, in such a population, a mutant LP individual  
 122 decided to accept to give HP individuals what they want? Upon meeting a HP individual

123 and being assigned the role of partner, this mutant would gain  $a + b - \delta G_{HP}$  (the resource  
124 to be shared minus the demand of a HP individual) instead of just  $\delta G_{LP}$  (the average  
125 payoff being discounted). Knowing  $G_{LP}$  and  $G_{HP}$ , it is easy to show that it is never  
126 possible that  $\delta G_{LP} \geq a + b - \delta G_{HP}$  as long as  $\delta < 1$ . In other words, at the evolutionary  
127 equilibrium, it is impossible that all LP individuals refuse to offer  $\delta G_{HP}$  to HP individuals,  
128 because they would gain more from doing so.

129 What if there was some polymorphism in the population such that only *some* LP indi-  
130 viduals refuse to give HP individuals what they ask for? The average social payoff of  
131 those LP individuals is still written the same as in equation (2). But because we know  
132 that at the evolutionary equilibrium all individuals with the same productivity must gain  
133 the same payoff, the payoff of all LP individuals will be the same, regardless of pheno-  
134 type. The coexistence of two types of LP individuals in the population would imply that  
135  $\delta G_{LP} = a + a - \delta G_{HP}$  (the payoff of the two types of LP individuals in the position  
136 of partner when paired with HP individuals is equal), but as we showed above, this is  
137 not possible as long as  $\delta < 1$ . As a consequence, it is not only impossible that *all* LP  
138 individuals refuse to give HP individuals what they want at the evolutionary equilibrium,  
139 it is also impossible that *some* LP individuals refuse to give HP individuals what they  
140 want as long as  $\delta < 1$ .

141 Following the same reasoning, it can be shown that it is not possible for some individuals  
142 (of any productivity) to refuse to give their social partner (of any productivity) what  
143 they ask for at the evolutionary equilibrium as long as  $\frac{a}{b} > \frac{\delta(x-1)}{\delta x - 2}$  (see SM section 2.2).  
144 When  $\frac{a}{b} \leq \frac{\delta(x-1)}{\delta x - 2}$ , it is possible that LP individuals refuse to give other LP individuals  
145 what they ask for. This condition reflects the fact that if the difference of productivity  
146 between HP and LP individuals is too large, it is more beneficial for LP individuals to



147 interact with HP individuals than with LP individuals. As we will see though, this is  
 148 only possible when partner choice is costly. Moreover, as long as  $\frac{a}{b} > 0.5$ , as is the case  
 149 in our simulations, it is not worth it for LP individuals to refuse to interact with other  
 150 LP individuals, and so all partners will give their decision makers what they want at the  
 151 evolutionary equilibrium.

152 If  $\frac{a}{b} > \frac{\delta(x-1)}{\delta x-2}$ , we can thus write:

$$\left\{ \begin{array}{l} r_{HPHP} = \delta G_{HP} \\ r_{HPLP} = \delta G_{LP} \\ r_{LPPLP} = \delta G_{LP} \\ r_{LPHP} = \delta G_{HP} \end{array} \right. \quad (4)$$

153 and if  $\frac{a}{b} \leq \frac{\delta(x-1)}{\delta x-2}$ , we can thus write:

$$\left\{ \begin{array}{l} r_{HPHP} = \delta G_{HP} \\ r_{HPLP} = \delta G_{LP} \\ r_{LPHP} = \delta G_{HP} \end{array} \right. \quad (5)$$

154 4.  $\frac{a}{b} > \frac{\delta(x-1)}{\delta x-2}$ , **no offer is never refused**

155 If  $\frac{a}{b} > \frac{\delta(x-1)}{\delta x-2}$ , from step 3. it directly results that no reward is ever rejected at the  
 156 evolutionary equilibrium, because each partner's reward is exactly equal to the decision  
 157 maker's MAR, and thus each reward is accepted. If no reward is ever refused, the average  
 158 payoff of LP and HP individuals respectively can be written as:

$$\left\{ \begin{array}{l} G_{LP} = (1-x) \left( \frac{1}{2} (-\delta G_{HP} + b + a) + \frac{\delta G_{LP}}{2} \right) + \frac{1}{2} x (a + a) \\ G_{HP} = x \left( \frac{\delta G_{HP}}{2} + \frac{1}{2} (-\delta G_{LP} + b + a) \right) + \frac{1}{2} (1-x) (b + b) \end{array} \right. \quad (6)$$

159 Solving this system gives us an expression for  $G_{HP}$  and  $G_{LP}$  as a function of  $x$  and  $\delta$  at  
 160 the evolutionary equilibrium:

$$\begin{cases} G_{LP} = \frac{b(\delta - \delta x + x - 1) + a((\delta - 1)x - 1)}{\delta - 2} \\ G_{HP} = \frac{b(\delta - \delta x + x - 2) + (\delta - 1)xa}{\delta - 2} \end{cases} \quad (7)$$

161 From (5) and (8), it is straightforward to show that when  $\delta$  tends toward 1 (partner choice  
 162 is not costly),  $r_{LPHP}$  tends toward  $b$ . That is, when partner choice is not costly, even if  
 163 LP individuals are in the strategically dominant position of partner, at the evolutionary  
 164 equilibrium they offer HP individuals an amount that is exactly equal to their productivity  
 165  $b$ . In percentage, this corresponds to an offer proportional to the relative contribution of  
 166 each individual: LP individuals offer HP individuals  $\frac{b}{b+a} * 100$  % of the total resource to  
 167 be shared.

168 Similarly, it can be shown that when  $\delta$  tends toward 1, LP individuals offer other LP  
 169 individuals  $a$  resources, HP individuals offer other HP individuals  $b$  resources, and HP  
 170 individuals offer LP individuals  $a$  resources. At the equilibrium, when partner choice is  
 171 not costly each individual is rewarded with an amount exactly equal to his contribution.

172 5.  $\frac{a}{b} \leq \frac{\delta(x-1)}{\delta x - 2}$ , **all LP individuals refuse to interact with other LP individuals**

173 In this case, the average payoff of LP and HP individuals respectively can be written as:

$$\begin{cases} G_{LP} = (1 - x) \left( \frac{1}{2} (-\delta G_{HP} + b + a) + \frac{\delta G_{LP}}{2} \right) + \delta x G_{LP} \\ G_{HP} = x \left( \frac{\delta G_{HP}}{2} + \frac{1}{2} (-\delta G_{LP} + b + a) \right) + \frac{1}{2} (1 - x) (b + b) \end{cases} \quad (8)$$

174 Solving this system gives us an expression for  $G_{HP}$  and  $G_{LP}$  as a function of  $x$  and  $\delta$  at the  
 175 evolutionary equilibrium:

$$\left\{ \begin{array}{l} G_{LP} = \frac{(x-1)((\delta-1)b+a(\delta x-1))}{\delta(x(\delta x-2)-1)+2} \\ G_{HP} = \frac{b(\delta((x-1)x-1)-x+2)-(\delta-1)xa}{\delta(x(\delta x-2)-1)+2} \end{array} \right. \quad (9)$$

176 From (6) and (10), it is straightforward to show that when  $\delta$  tends toward 1, the previous  
 177 results hold: LP individuals offer HP individuals  $b$  resources, HP individuals offer other HP  
 178 individuals  $b$  resources, and HP individuals offer LP individuals  $a$  resources.

179 **2.2 Verification that partners are always better off giving their de-**  
 180 **cision maker what they want at the evolutionary equilibrium,**  
 181 **except when  $\frac{a}{b} \leq \frac{\delta(x-1)}{\delta x-2}$**

182 There are four hypothetical primary situations that need to be taken into account:

- 183 • A: when HP individuals are partners, they refuse to give other HP individuals what they  
 184 want
- 185 • B: when HP individuals are partners, they refuse to give other LP individuals what they  
 186 want
- 187 • C: when LP individuals are partners, they refuse to give other LP individuals what they  
 188 want
- 189 • D: when LP individuals are partners, they refuse to give HP individuals what they want

190 These situations are not mutually exclusive, however, so the total number of possible situ-  
 191 ations is:

$$192 \sum_{k=1}^4 \binom{4}{k} = 15$$

193 Situation D was already proven to be impossible at the evolutionary equilibrium in the  
 194 previous section. We now show that the same holds for the 14 remaining situations, except in  
 195 situation C. We give the expected social payoff of HP and LP individuals in each situation. We  
 196 also give the condition that must be satisfied for each situation to be possible at the evolutionary  
 197 equilibrium; it is then straightforward to show that, given our parameter values ( $0 \leq x \leq 1$ ,  
 198  $0 \leq \delta < 1$ ), this condition can never be satisfied.

199 Situation A:

- 200 •  $G_{LP} = (1 - x) \left( \frac{1}{2} (-\delta G_{HP} + b + a) + \frac{\delta G_{LP}}{2} \right) + \frac{1}{2} x (a + a)$
- 201 •  $G_{HP} = x \left( \frac{\delta G_{HP}}{2} + \frac{1}{2} (-\delta G_{LP} + b + a) \right) + \delta (1 - x) G_{HP}$
- 202 • Condition  $-\delta G_{HP} + b + b \leq \delta G_{HP}$  impossible

203 Situation C:

- 204 •  $G_{LP} = (1 - x) \left( \frac{1}{2} (-\delta G_{HP} + b + a) + \frac{\delta G_{LP}}{2} \right) + \delta x G_{LP}$
- 205 •  $G_{HP} = x \left( \frac{\delta G_{HP}}{2} + \frac{1}{2} (-\delta G_{LP} + b + a) \right) + \frac{1}{2} (1 - x) (b + b)$
- 206 • Condition  $-\delta G_{LP} + a + a \leq \delta G_{LP}$  impossible when  $a > \frac{\delta(x-1)b}{\delta x - 2}$

207 Situation B:

- 208 •  $G_{LP} = (1 - x) \left( \frac{1}{2} (-\delta G_{HP} + b + a) + \frac{\delta G_{LP}}{2} \right) + \frac{1}{2} x (a + a)$
- 209 •  $G_{HP} = x \left( \frac{\delta G_{HP}}{2} + \frac{\delta G_{HP}}{2} \right) + \frac{1}{2} (1 - x) (b + b)$
- 210 • Condition  $-\delta G_{LP} + b + a \leq \delta G_{HP}$  impossible

211 Situation A & C:

- 212 •  $G_{LP} = (1 - x) \left( \frac{1}{2} (-\delta G_{HP} + b + a) + \frac{\delta G_{LP}}{2} \right) + \delta x G_{LP}$

213 •  $G_{\text{HP}} = x \left( \frac{\delta G_{\text{HP}}}{2} + \frac{1}{2}(-\delta G_{\text{LP}} + b + a) \right) + \delta(1 - x)G_{\text{HP}}$

214 • Condition  $-\delta G_{\text{LP}} + a + a \leq \delta G_{\text{LP}} \wedge -\delta G_{\text{HP}} + b + b \leq \delta G_{\text{HP}}$  impossible

215 Situation B & C:

216 •  $G_{\text{LP}} = (1 - x) \left( \frac{1}{2}(-\delta G_{\text{HP}} + b + a) + \frac{\delta G_{\text{LP}}}{2} \right) + \delta x G_{\text{LP}}$

217 •  $G_{\text{HP}} = x \left( \frac{\delta G_{\text{HP}}}{2} + \frac{\delta G_{\text{HP}}}{2} \right) + \frac{1}{2}(1 - x)(b + b)$

218 • Condition  $-\delta G_{\text{LP}} + a + a \leq \delta G_{\text{LP}} \wedge -\delta G_{\text{LP}} + b + a \leq \delta G_{\text{HP}}$  impossible

219 Situation C & D:

220 •  $G_{\text{LP}} = \delta x G_{\text{LP}} + (1 - x) \left( \frac{\delta G_{\text{LP}}}{2} + \frac{\delta G_{\text{LP}}}{2} \right)$

221 •  $G_{\text{HP}} = x \left( \frac{\delta G_{\text{HP}}}{2} + \frac{1}{2}(-\delta G_{\text{LP}} + b + a) \right) + \frac{1}{2}(1 - x)(b + b)$

222 • Condition  $-\delta G_{\text{LP}} + a + a \leq \delta G_{\text{LP}} \wedge -\delta G_{\text{HP}} + b + a \leq \delta G_{\text{LP}}$  impossible

223 Situation B & D:

224 •  $G_{\text{LP}} = (1 - x) \left( \frac{\delta G_{\text{LP}}}{2} + \frac{\delta G_{\text{LP}}}{2} \right) + \frac{1}{2}x(a + a)$

225 •  $G_{\text{HP}} = x \left( \frac{\delta G_{\text{HP}}}{2} + \frac{\delta G_{\text{HP}}}{2} \right) + \frac{1}{2}(1 - x)(b + b)$

226 • Condition  $-\delta G_{\text{HP}} + b + a \leq \delta G_{\text{LP}} \wedge -\delta G_{\text{LP}} + b + a \leq \delta G_{\text{HP}}$  impossible

227 Situation A & D:

228 •  $G_{\text{LP}} = (1 - x) \left( \frac{\delta G_{\text{LP}}}{2} + \frac{\delta G_{\text{LP}}}{2} \right) + \frac{1}{2}x(a + a)$

229 •  $G_{\text{HP}} = x \left( \frac{\delta G_{\text{HP}}}{2} + \frac{1}{2}(-\delta G_{\text{LP}} + b + a) \right) + \delta(1 - x)G_{\text{HP}}$

230 • Condition  $-\delta G_{\text{HP}} + b + a \leq \delta G_{\text{LP}} \wedge -\delta G_{\text{HP}} + b + b \leq \delta G_{\text{HP}}$  impossible

231 Situation A & B:

232 •  $G_{LP} = (1 - x) \left( \frac{1}{2} (-\delta G_{HP} + b + a) + \frac{\delta G_{LP}}{2} \right) + \frac{1}{2} x (a + a)$

233 •  $G_{HP} = \delta(1 - x)G_{HP} + x \left( \frac{\delta G_{HP}}{2} + \frac{\delta G_{HP}}{2} \right)$

234 • Condition  $-\delta G_{HP} + b + b \leq \delta G_{HP} \wedge -\delta G_{LP} + b + a \leq \delta G_{HP}$  impossible

235 Situation A & C & D:

236 •  $G_{LP} = \delta x G_{LP} + (1 - x) \left( \frac{\delta G_{LP}}{2} + \frac{\delta G_{LP}}{2} \right)$

237 •  $G_{HP} = x \left( \frac{\delta G_{HP}}{2} + \frac{1}{2} (-\delta G_{LP} + b + a) \right) + \delta(1 - x)G_{HP}$

238 • Condition  $-\delta G_{LP} + a + a \leq \delta G_{LP} \wedge -\delta G_{HP} + b + b \leq \delta G_{HP} \wedge -\delta G_{HP} + b + a \leq \delta G_{LP}$

239 impossible

240 Situation A & B & C:

241 •  $G_{LP} = (1 - x) \left( \frac{1}{2} (-\delta G_{HP} + b + a) + \frac{\delta G_{LP}}{2} \right) + \delta x G_{LP}$

242 •  $G_{HP} = \delta(1 - x)G_{HP} + x \left( \frac{\delta G_{HP}}{2} + \frac{\delta G_{HP}}{2} \right)$

243 • Condition  $-\delta G_{LP} + a + a \leq \delta G_{LP} \wedge -\delta G_{HP} + b + b \leq \delta G_{HP} \wedge -\delta G_{LP} + b + a \leq \delta G_{HP}$

244 impossible

245 Situation B & C & D:

246 •  $G_{LP} = \delta x G_{LP} + (1 - x) \left( \frac{\delta G_{LP}}{2} + \frac{\delta G_{LP}}{2} \right)$

247 •  $G_{HP} = x \left( \frac{\delta G_{HP}}{2} + \frac{\delta G_{HP}}{2} \right) + \frac{1}{2}(1 - x)(b + b)$

248 • Condition  $-\delta G_{LP} + a + a \leq \delta G_{LP} \wedge -\delta G_{HP} + b + a \leq \delta G_{LP} \wedge -\delta G_{LP} + b + a \leq \delta G_{HP}$

249 impossible

250 Situation A & B & D:

251 •  $G_{LP} = (1 - x) \left( \frac{\delta G_{LP}}{2} + \frac{\delta G_{LP}}{2} \right) + \frac{1}{2} x (a + a)$

252 •  $G_{\text{HP}} = \delta(1 - x)G_{\text{HP}} + x \left( \frac{\delta G_{\text{HP}}}{2} + \frac{\delta G_{\text{HP}}}{2} \right)$

253 • Condition  $-\delta G_{\text{HP}} + b + b \leq \delta G_{\text{HP}} \wedge -\delta G_{\text{LP}} + b + a \leq \delta G_{\text{HP}} \wedge -\delta G_{\text{HP}} + b + a \leq \delta G_{\text{LP}}$

254 impossible

255 Situation A & B & C & D:

256 •  $G_{\text{LP}} = \delta(1 - x)G_{\text{LP}} + \delta x G_{\text{LP}}$

257 •  $G_{\text{HP}} = \delta(1 - x)G_{\text{HP}} + \delta x G_{\text{HP}}$

258 • Condition  $-\delta G_{\text{HP}} + b + b \leq \delta G_{\text{HP}} \wedge -\delta G_{\text{LP}} + b + a \leq \delta G_{\text{HP}} \wedge -\delta G_{\text{LP}} + a + a \leq \delta G_{\text{LP}} \wedge$

259  $-\delta G_{\text{HP}} + b + a \leq \delta G_{\text{LP}}$  impossible

260 As explained in the previous section, the verification that it is not possible for *some* (but  
 261 not all) individuals not to interact with other individuals at the evolutionary equilibrium (in  
 262 case of polymorphism) is already implied by the use of not strict inequalities.

### 263 3 Supplementary discussion

#### 264 3.1 Opportunity costs

265 In the main article, we explain that when high-productivity individuals are assessing a low-  
 266 productivity individual's reward, they have opportunity costs (or "outside options") of 2 be-  
 267 cause they expect to receive 2 with other high-productivity individuals *on average*. It is  
 268 important to see that this is true only because high-productivity individuals have an equal  
 269 chance of playing the role of either decision-maker or partner when they interact with other  
 270 high-productivity individuals. If some high-productivity individuals always played the role of  
 271 decision maker with other high-productivity individuals, they would be exploited all the time

272 by those high-productivity partners, which would drastically reduce their outside options when  
273 bargaining with low-productivity individuals, preventing the evolution of proportionality. Thus,  
274 in our model the evolution of proportionality depends as much on the possibility of changing  
275 *roles* as on the possibility of changing *partners*. In real life, this is the equivalent of having a  
276 rich and varied social life with multiple cooperative opportunities in which one is not always in  
277 the worse bargaining position [3, 4].

### 278 **3.2 Theoretical problems with partner choice**

279 Partner choice is an intrinsically complicated subject. The existence of a wide variety of coop-  
280 erative partners to choose from means that a wide variety of social strategies can coexist and  
281 provide the same benefits, complicating evolutionary analysis. For example, an individual's ac-  
282 ceptance of low rewards as a decision maker could be compensated by the low rewards she herself  
283 makes as a partner. Or some low payoffs received when interacting with low-productivity indi-  
284 viduals could be compensated by high payoffs received when interacting with high-productivity  
285 individuals.

286 These effects explain why a quick look at the evolved strategies of individuals is not always  
287 enough to find a pattern of proportionality. This is especially true with neural networks working  
288 on a continuum of productivities or effort. While, as we have shown, the theoretical fitness-  
289 maximizing behavior is to offer an amount proportional to one's own relative contribution, it  
290 is not necessarily the case that neural networks will produce proportional offers for the *whole*  
291 range of inputs they are exposed to. Imagine an individual who offers proportional rewards only  
292 to the best producers in the population, while offering less-than-proportional rewards to other  
293 individuals. At the evolutionary equilibrium, our model predicts that these unfair rewards will  
294 be rejected. But as long as finding a new partner is not costly, being rejected does not lead to  
295 a loss of fitness. As a consequence, any individual can offer less-than-proportional rewards to a



296 fraction of the population, as long as another fraction still accepts the rewards she makes that  
297 are proportional. In other words, individuals can specialize in offering proportional rewards to  
298 only a fraction of the range of productivities in the population, and stop interacting with the  
299 remaining fraction. Because they stop interacting, the rewards offered to this fraction become  
300 subject to drift.

301 Because of this mechanism, it is possible that averaging the output of different evolved  
302 neural networks does not reveal a pattern of proportionality. In our simulations, averaging  
303 the output of 15,000 neural networks producing MARs yielded an almost perfect proportional  
304 relationship between contributions and MARs (main paper, Fig. 3C). Plotting the average  
305 output of 15,000 neural networks producing *rewards* did not show such a perfectly proportional  
306 relationship, although it was not far from it. Here, it is important to remember that despite  
307 this variability in the rewards that are extended, proportionality prevails when we look only  
308 at the interactions that *actually take place*: only proportional rewards are accepted at the  
309 evolutionary equilibrium, as evidenced in Fig. 3B of the main article.

310 Finally, problems of neutrality add complexity to the analysis. Although at the beginning  
311 of our simulations raising MARs drove the evolution of proportional rewards, once proportional  
312 rewards had spread in the population, the selection pressure to maintain high MARs disap-  
313 peared: if all individuals offer rewards of  $r$ , requesting  $r$  or  $r - \epsilon$  as a decision maker brings the  
314 same payoff. Because of drift, MARs can thus start to decrease, and in turn partners will be  
315 selected to decrease their rewards to try to exploit those undemanding decision makers. This  
316 exploitation cannot last for long, as it soon revives the selection pressure to increase MARs,  
317 but the dynamic exists. Although it is rather easy to conceptualize why, under appropriate  
318 conditions, partner choice leads to proportionality, the actual dynamics underlying this result  
319 are far from straightforward to understand.

## 320 References

- 321 [1] Jean-Baptiste André and Nicolas Baumard. Social opportunities and the evolution of fair-  
322 ness. *Journal of theoretical biology*, 289:128–35, nov 2011. doi: 10.1016/j.jtbi.2011.07.031.
- 323 [2] JM McNamara, Zoltan Barta, Lutz Fromhage, and AI Houston. The coevolution of choosi-  
324 ness and cooperation. *Nature*, 451(7175):189–192, jan 2008. doi: 10.1038/nature06455.
- 325 [3] Polly Wiessner. Leveling the hunter: constraints on the status quest in foraging societies.  
326 In *Food and the Status Quest: An Interdisciplinary Perspective*, pages 171–192. Berghahn  
327 Books, Oxford, UK, p. wiessne edition, 1996.
- 328 [4] Hillard S Kaplan, Paul L Hooper, and Michael Gurven. The evolutionary and ecological  
329 roots of human social organization. *Philosophical transactions of the Royal Society B.*, 364  
330 (1533):3289–99, nov 2009. doi: 10.1098/rstb.2009.0115.
